# Supplementary material for: Polyaniline-intercalated MIL-101: selective CO2sorption and supercapacitor properties
Source: Royal Society of Chemistry journal article supplement (doi:10.1039/c5nj03477a), 2016-01-01
Supplement: c5nj03477a1.pdf [file c5nj03477a1.pdf]

## Electronic Supplementary Information

### Polyaniline-intercalated MIL-101: selective CO<sub>2</sub> sorption and supercapacitor properties

Sokhrab B. Aliev, Denis G. Samsonenko, Evgeny A. Maksimovskiy, Ekaterina O. Fedorovskaya,  
Sergey A. Sapchenko and Vladimir P. Fedin

Table S1. Adsorption characteristics of selected Cr-MOFs and MOFs with -N and -O sites

| Compounds                       | BET surface area, m <sup>2</sup> /g | CO <sub>2</sub> uptake, mmol/g | T, K | Selectivity CO <sub>2</sub> /N <sub>2</sub> | Ref. |
|---------------------------------|-------------------------------------|--------------------------------|------|---------------------------------------------|------|
| MIL-101(Cr)                     | 3500                                | 2.90                           | 288  | 12                                          | 1    |
| DETA@MIL-101(Cr)                | 1560                                | 0.97                           | 273  | –                                           | 2    |
| Ag@MIL-101(Cr)                  | 1417                                | 1.4                            | 298  | –                                           | 3    |
| PEI@MIL-101(Cr)-NH <sub>2</sub> | 947                                 | 3.5                            | 298  | –                                           | 4    |
| MIL-101(Cr)-pNO <sub>2</sub>    | 2195                                | 2.76                           | 273  | 15                                          | 5    |
| MIL-101(Cr)-pNO <sub>2</sub>    | 2195                                | 1.66                           | 298  | 24                                          |      |
| MIL-101(Cr)-NH <sub>2</sub>     | 2687                                | 5                              | 273  | 73                                          |      |
| MIL-101(Cr)-NH <sub>2</sub>     | 2687                                | 3.6                            | 293  | 100                                         |      |
| mmen-Cu-BTTri                   | 870                                 | 3.49                           | 298  | 165                                         | 6    |
| Mg <sub>2</sub> (dobdc)         | 1470                                | 8.00                           | 303  | 44                                          | 7    |
| bio-MOF-11                      | 1040                                | 3.44                           | 298  | 45                                          | 8    |

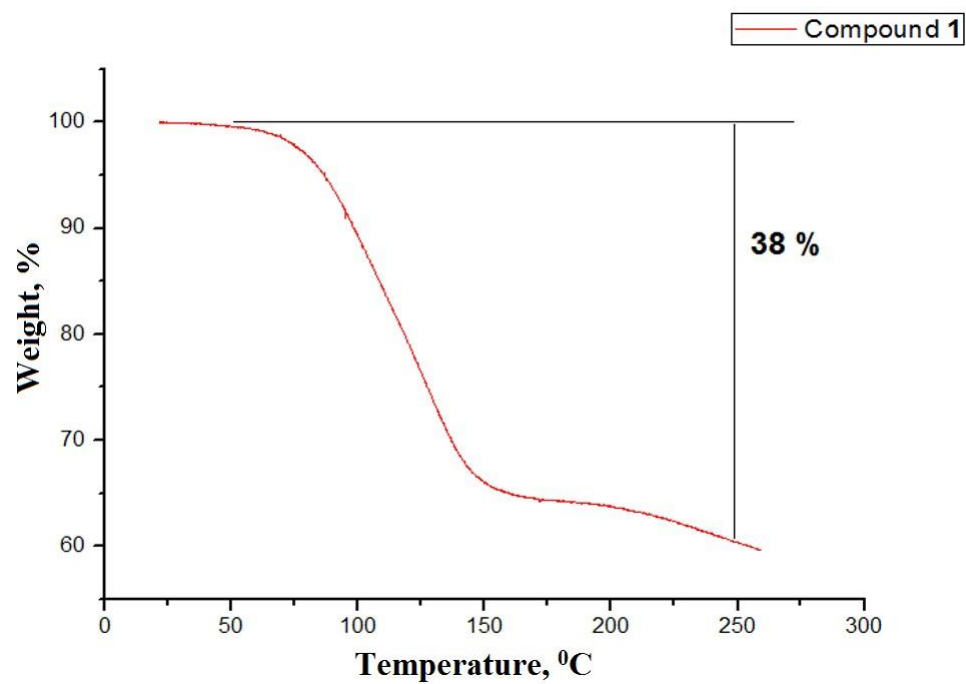

**Fig. S1** TG plot of the compound 1

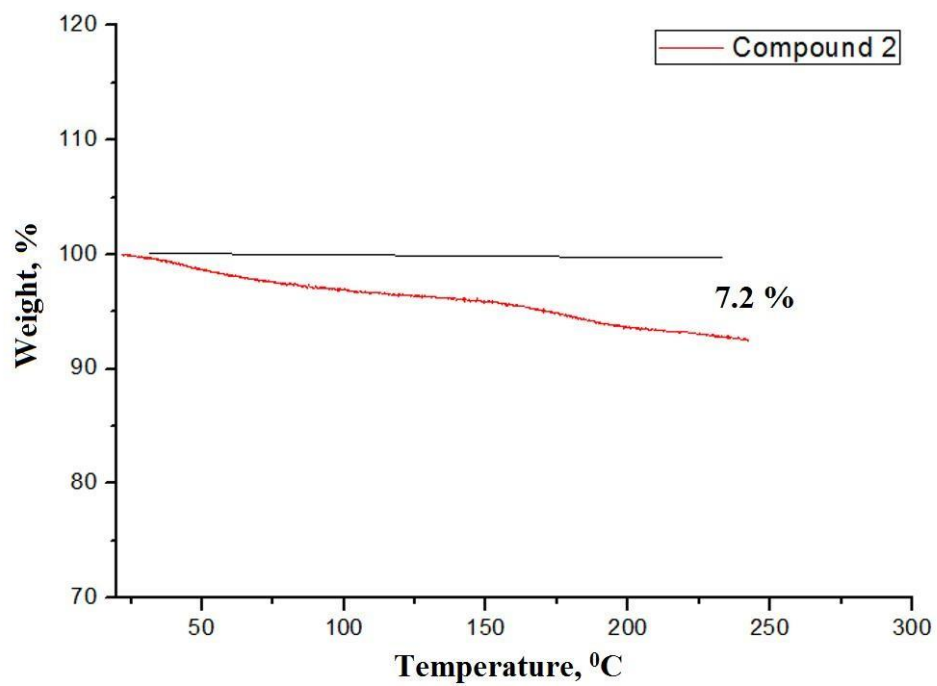

**Fig. S2** TG plot of the compound 2

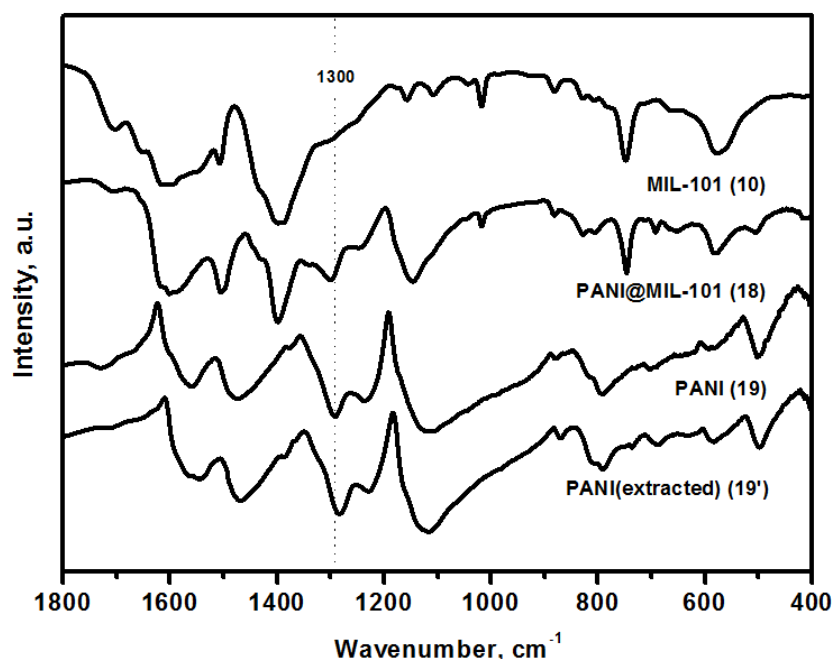

**Fig. S3** IR spectra of MIL-101, PANI@MIL-101 , PANI(pristine) and PANI extracted from PANI@MIL-101 channels.

#### **PANI molecular weight measurements:**

Four solutions with different concentrations of PANI were prepared by the dissolving the extracted PANI in concentrated sulfuric acid and the viscosimetric technique was used. The reduced viscosities ( $\eta$ ) of these samples were determined at 25°C using an Ubbelohde viscometer according to the equation:

$$\eta = \frac{t - t^0}{ct^0},$$

where  $t^0$  is the drip time of a pure sulfuric acid,  $t$  is the drip time for a polyaniline solution of a known concentration  $c$  (g/dL).  $\eta$  was then plotted versus the polyaniline concentration. The linear extrapolation of the plot to zero concentration revealed the value of  $[\eta] = 0.479$  dL/g (Fig. S4, S5).

Average molecular weights for encapsulated and free PANI were calculated using the Mark–Houwink equation:

$$[\eta] = K M^\alpha$$

with constants  $K = 1.95 \cdot 10^{-6}$  and  $\alpha = 1.36$  for PANI [9].

The average molecular weight of the extracted PANI was found to be 9176 Da (Fig. S6). This value corresponds to the average chain length of 101 aniline monomers. Same operations were performed for pristine PANI, the molecular weight was 9990 Da and corresponded to the chain length of ca. 110 aniline monomers.

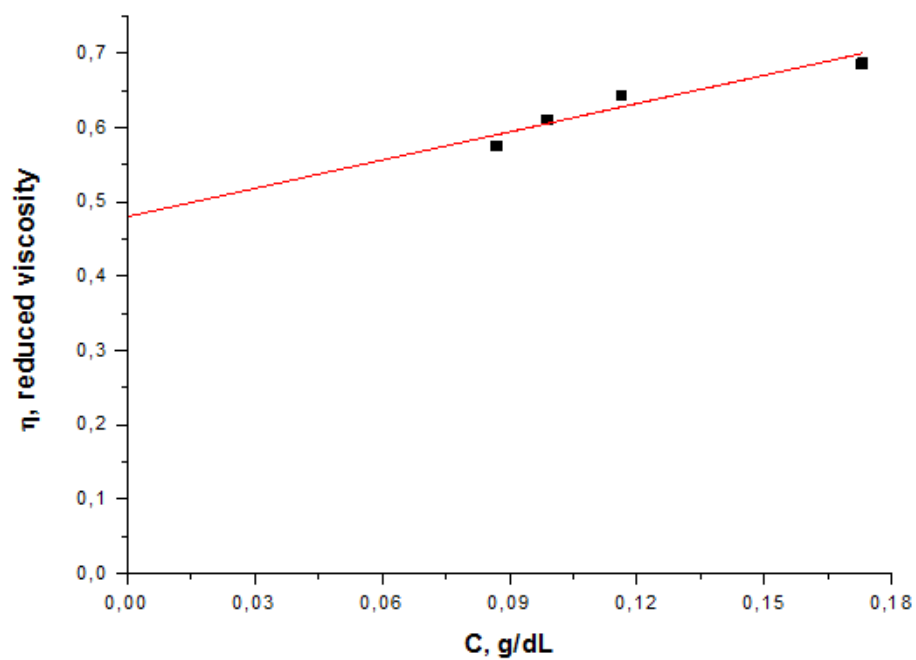

**Fig. S4** Dependence of reduced viscosity on concentration of PANI extracted from **2** in sulfuric acid solution

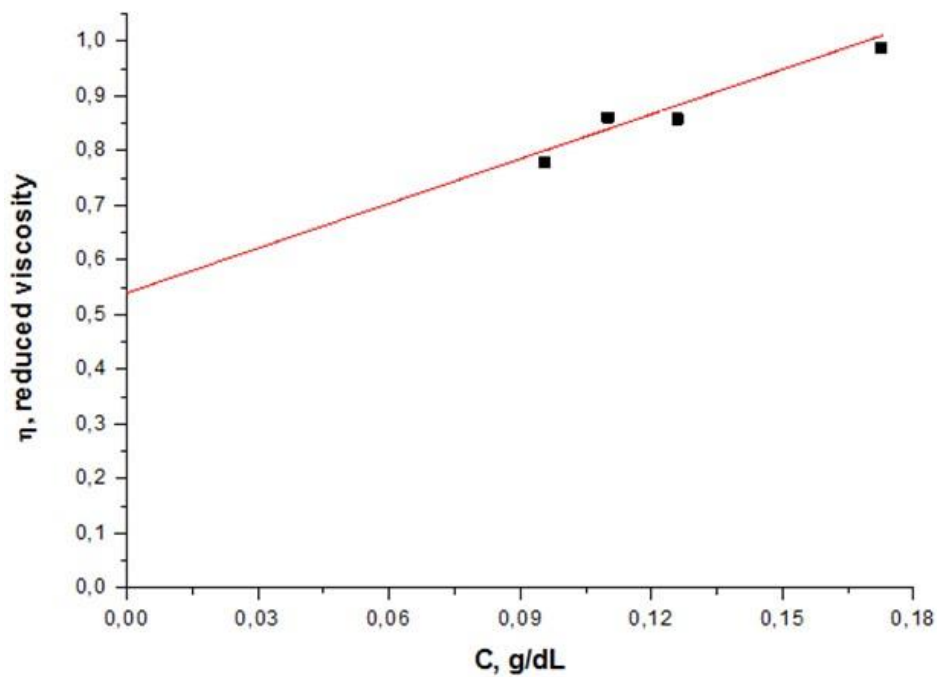

**Fig. S5** Dependence of reduced viscosity on concentration of PANI obtained in a free form in sulfuric acid solution

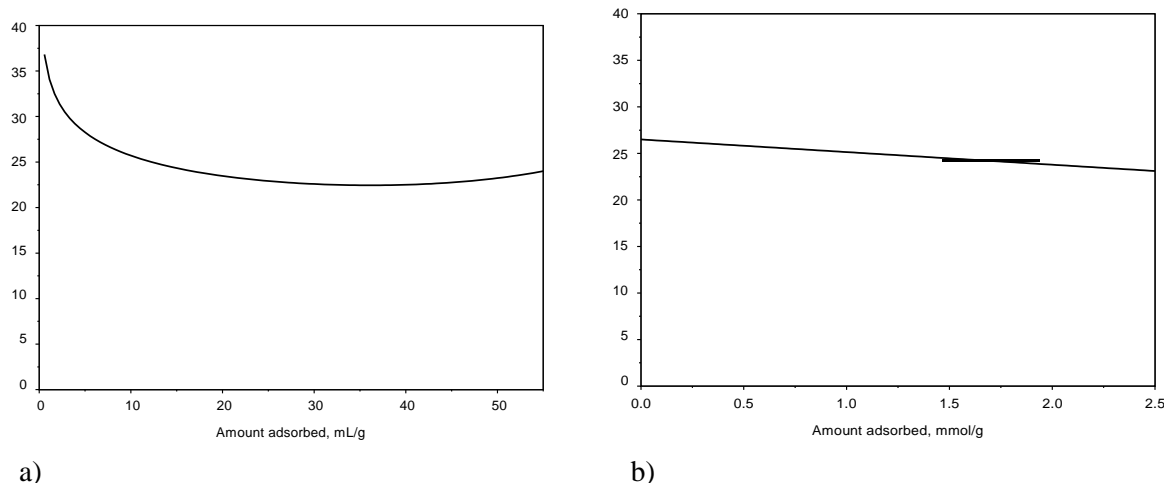

**Fig. S6** Adsorption enthalpies of CO<sub>2</sub> for compound **2** as functions of gravimetric uptake. calculated from (a) Clausius–Clapeyron relation. ( b) virial equation of state

### Enthalpy Calculations

a) Adsorption enthalpies calculated by fitting the sorption plots at 273 and 293 K with Clausius–Clapeyron relation

$$\frac{\omega}{\omega_m} = \frac{BP^{1/t}}{1 + BP^{1/t}},$$

where  $\omega$  –adsorbed amount of CO<sub>2</sub>,  $\omega_m$ –adsorbed amount of CO<sub>2</sub> at saturation, P – pressure, B and t are constants.

The found parameters for both isotherms:

$$\omega_{m1} = 109.921 \pm 2.267 \quad (2.062\%)$$

$$B_1 = 0.00373906 \pm 4.812 \cdot 10^{-5} \quad (1.287\%)$$

$$t_1 = 1.24985 \pm 0.0102 \quad (0.8158\%)$$

$$\omega_{m2} = 92.0159 \pm 3.25 \quad (3.532\%)$$

$$B_2 = 0.00162636 \pm 2.803 \cdot 10^{-5} \quad (1.723\%)$$

$$T_2 = 1.13076 \pm 0.01212 \quad (1.072\%)$$

The enthalpy of sorption can be calculated according to the formula:

$$\Delta H_{ads} = R \frac{T_2^2}{T_2 - T_1} \ln \frac{P_1}{P_2}$$

where  $T_1=273$  K,  $T_2=293$  K, and pressure P was calculated by the formula:

$$P = \left( \frac{\frac{\omega}{\omega_m}}{B - B \frac{\omega}{\omega_m}} \right)^t$$

b) Adsorption enthalpies calculated by fitting the sorption plots with the virial equation of state  $\ln p(n,T) = \ln n + (a_0 + a_1 \cdot n)/T + b_0$ ,

where  $p$  is pressure (normalized to  $p_0=1$  atm),  $n$  is coverage ( $\text{mol g}^{-1}$ ),  $T$  is temperature, and  $a_i$  and  $b_i$  are temperature independent empirical parameters. Their values are given below:

$$a_0 = -3187.47 \pm 55.16 \quad (1.731\%)$$

$$a_1 = 163.268 \pm 3.158 \quad (1.934\%)$$

$$b_0 = 9.71839 \pm 0.1929 \quad (1.985\%).$$

The isosteric heat of adsorption was determined as a function of coverage:

$$Q_{st} = -R(a_0 + a_1 n).$$

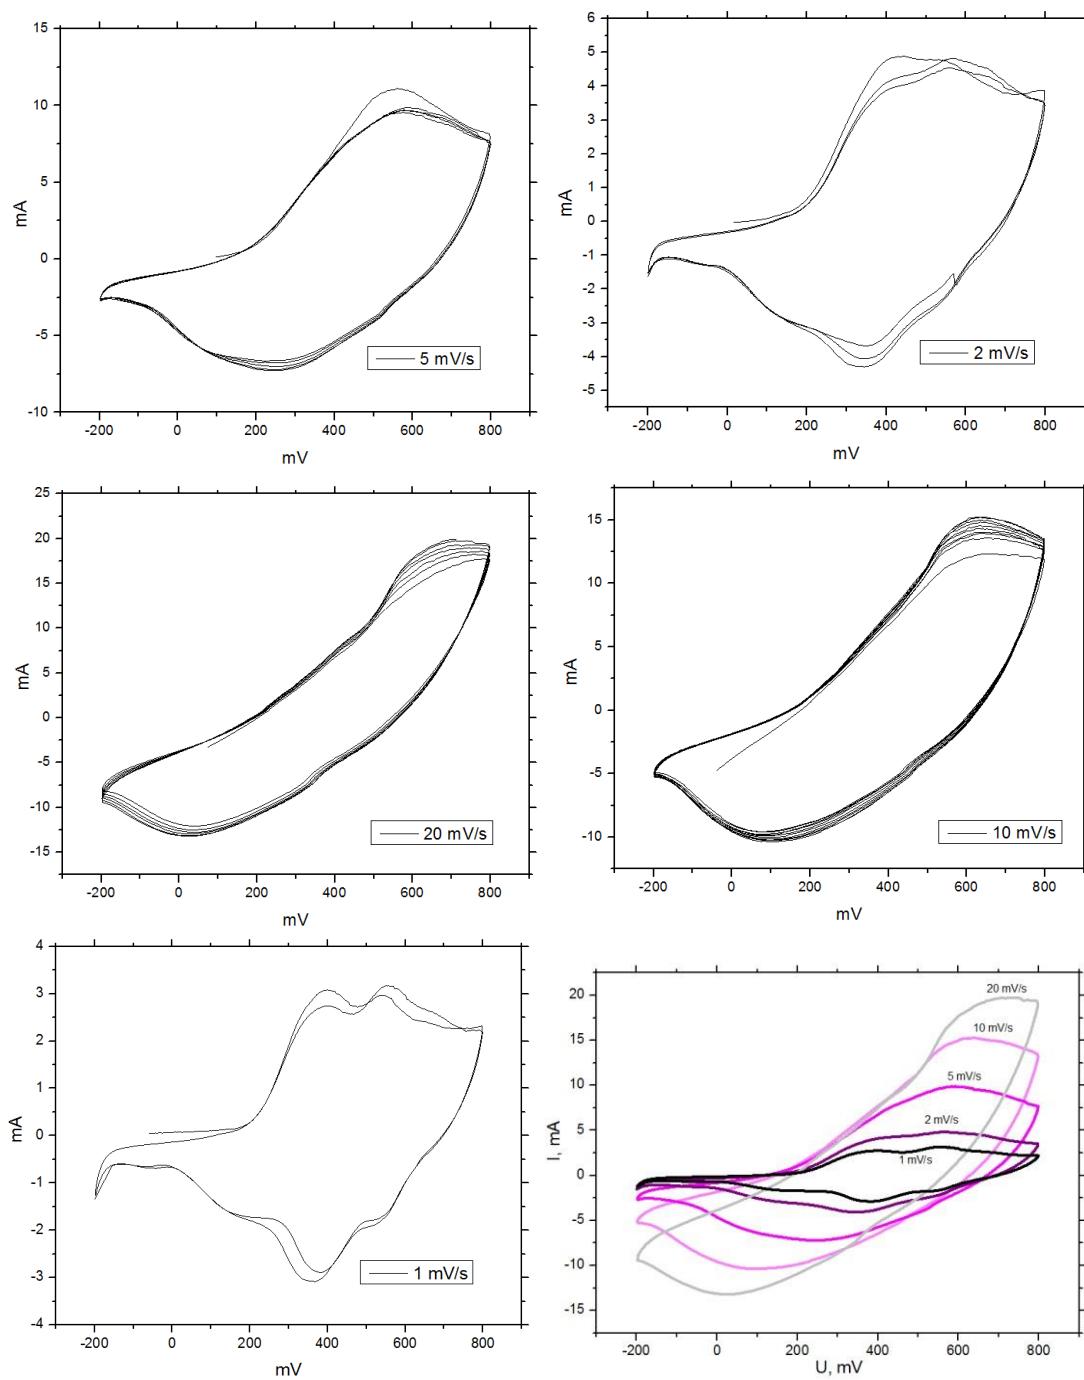

**Fig. S7** Cyclic voltammograms of **2** measured at 20, 10, 5, 2 and 1 mV/s rates of the potential scan

## References

1. K. Munusamy, G. Sethia, D. V. Patil, P. B. S. Rallapalli, R. S. Somani and H. C. Bajaj, *Chem. Eng. J.*, 2012, **195-196**, 359.
2. S. Kim, S. Yang, J. Kim, J. Park and W. Ahn, *Cryst. Eng. Comm*, 2012, **14**, 4142.
3. X. Liu, J. Ma, Z. Niu, G. Yang and P. Cheng, *Angew. Chem. Int. Ed.*, 2014, **54**, 988.
4. Q. Xin, J. Ouyang, T. Liu, Z. Li, Z. Li, Y. Liu, S. Wang, H. Wu, Z. Jiang and X. Cao, *ACS Appl. Mater. Interfaces*, 2015, **7**, 1065.
5. A. Khutia and C. Janiak, *Dalton Trans.*, 2014, **43**, 1338.
6. T. M. McDonald, D. M. D'Alessandro, R. Krishna and J. R. Long, *Chem. Sci.*, 2011, **2**, 2022.
7. S. R. Caskey, A. G. Wong-Foy and Adam J. Matzger, *J. Am. Chem. Soc.*, 2008, **130**, 10870.
8. J. An, S. J. Geib and N. L. Rosi, *J. Am. Chem. Soc.*, 2010, **132**, 38.
9. S. C. Hobaica, *J. Polym. Sci.: Polym. Phys.*, 2003, **41**, 807.
